# Supplementary material for: The nuclear DICER–circular RNA complex drives the deregulation of the glioblastoma cell microRNAome
Source: PubMed Central journal article supplement — Sci Adv. 2020 Dec 16;6(51):eabc0221. doi: 10.1126/sciadv.abc0221 (PMC7744081; doi:10.1126/sciadv.abc0221), 2020-12-16
Supplement: supp_6_51_eabc0221__1.pdf [file supp_6_51_eabc0221__1.pdf]

## Supplementary Materials for

### **The nuclear DICER–circular RNA complex drives the deregulation of the glioblastoma cell microRNAome**

A. Bronisz\*, A. K. Rooj, K. Krawczyński, P. Peruzzi, E. Salińska, I. Nakano, B. Purow, E. A. Chiocca, J. Godlewski\*

\*Corresponding author. Email: [jgodlewski@bwh.harvard.edu](mailto:jgodlewski@bwh.harvard.edu) (J.G.); [abronisz@bwh.harvard.edu](mailto:abronisz@bwh.harvard.edu) (A.B.)

Published 16 December 2020, *Sci. Adv.* **6**, eabc0221 (2020)

DOI: [10.1126/sciadv.abc0221](https://doi.org/10.1126/sciadv.abc0221)

#### **The PDF file includes:**

Figs. S1 to S6  
Legends for tables S1 to S3  
Table S4

#### **Other Supplementary Material for this manuscript includes the following:**

(available at [advances.sciencemag.org/cgi/content/full/6/51/eabc0221/DC1](https://advances.sciencemag.org/cgi/content/full/6/51/eabc0221/DC1))

Tables S1 to S3

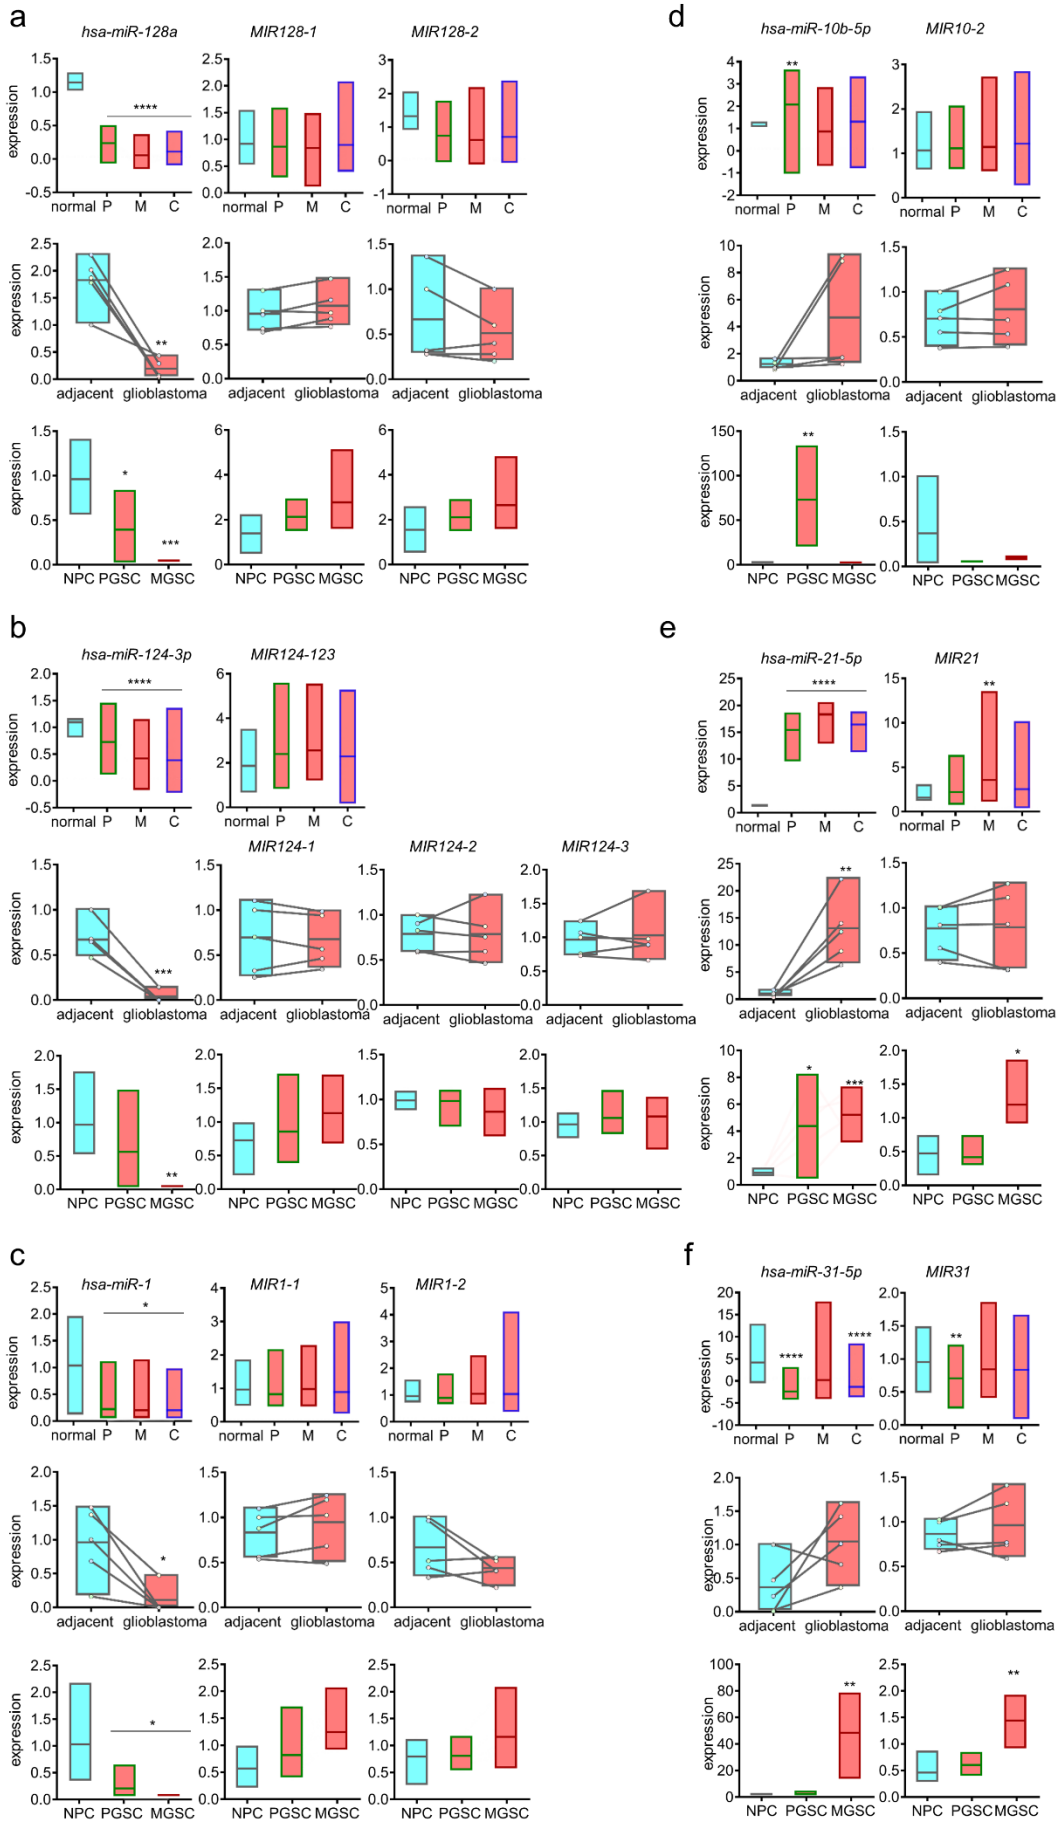

**Supplementary Figure S1 related to Figure 1.**

**Mature, but not precursor microRNAs are suppressed in glioblastomas and GSCs.**

**a-f:** Validation of data shown on the main **Fig. 1a-i** by averaged expression of selected mature microRNAs and microRNA precursors by TCGA data analysis (**a-f:** upper panels, blue bars – healthy individuals, red bars – glioblastoma patients from three dominant subtypes: P – proneural, M - mesenchymal, and C – classical subtypes, n=82, 145, and 134, respectively) and qPCR analysis (**a-f:** middle panels, blue bars - adjacent, non-pathological brain, red bars - glioblastoma tissue; matching lines identify pairs, n=5 each; **a-f:** lower panels, blue bars – NPCs, green bars – P GSCs (P), and red bars – M GSCs (M) subtypes, n=5 per group). Mature and precursor microRNAs: *hsa-miR-128a*, *MIR128-1*, *MIR-128-2* (**a**), *hsa-miR-124-3p*, *MIR-124-1*, *MIR-124-2*, *MIR-124-3* (**b**), *hsa-miR-1*, *MIR1-1*, *MIR-1-2* (**c**), *hsa-miR-10b-5p*, *MIR10-2* (**d**), *hsa-miR-21-5p*, *MIR21* (**e**), *hsa-miR-31-5p*, *MIR31* (**f**). Data are shown as mean  $\pm$  SD (matching pairs identified by lines; p-value: \* <0.05, \*\* <0.01, \*\*\* <0.001, \*\*\*\* <0.0001).

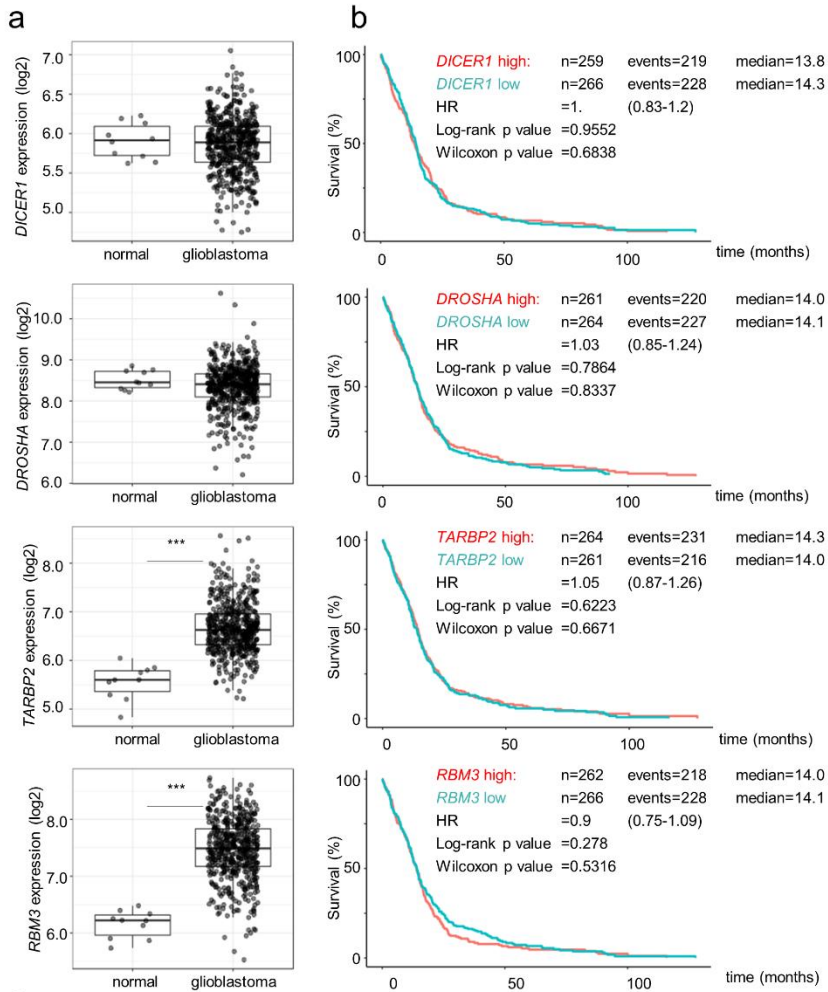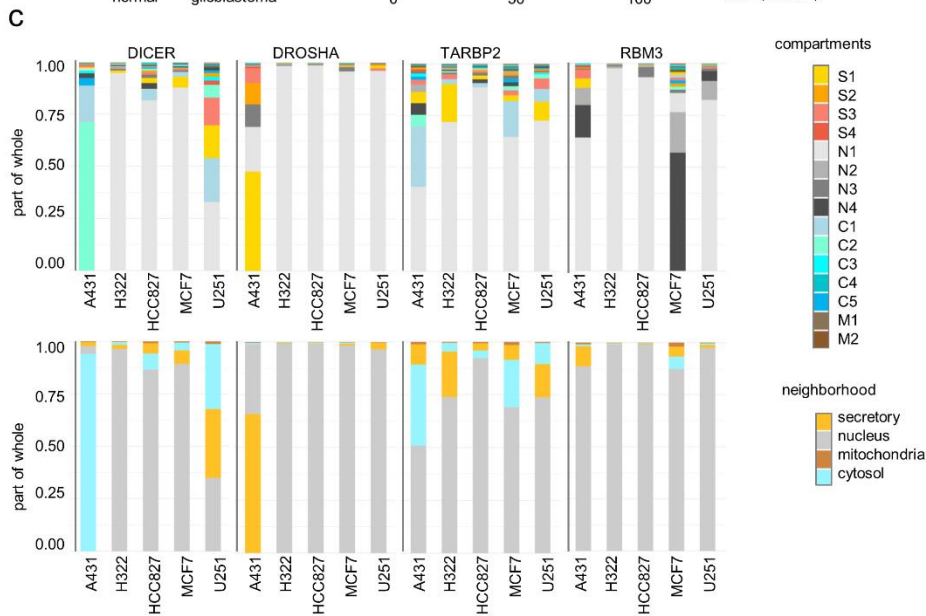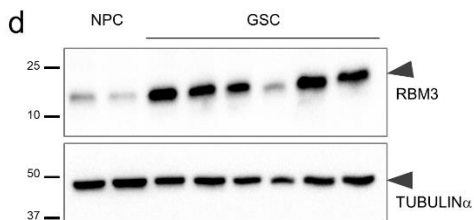

**Supplementary Figure S2 related to Figure 2.**

**Genes encoding for proteins vital for microRNA processing are not linked to glioblastoma patients' survival.**

**a:** The scatter plot analysis of DICER, DROSHA, TARBP2, and RBM3 expression in the TCGA dataset of glioblastoma patients (n=528) vs. healthy individuals (n=10), p-value: \*\*\* <0.001.

**b:** Kaplan-Meier survival analysis of DICER, DROSHA, TARBP2 and RBM3 expression association with patient survival in TCGA dataset of glioblastoma patients.

**c:** Bar analysis of cell-line-specific localization of DICER, DROSHA, TARBP2, and RBM3 in Subcell Barcode dataset based on the mass-spectroscopy analysis; S1 - Golgi, endo/lysosome, S2 - ER, peroxisome, S3 - ER, mito.ribosome, S4 - plasma membrane, N1 - nucleosol high density, ribosome, N2 - nucleus, speckles, N3 - nucleus, nucleolus, N4 - nucleosol, C1, C2, C3, C4 - cytosol, cytoskeleton, M1 - mitochondria matrix, M2 - mitochondria membrane.

**d:** Western blot analysis of RBM3 in the whole-cell lysate of NPCs (n=2) and GSCs (n=6). TUBULIN $\alpha$  was used as a loading control.

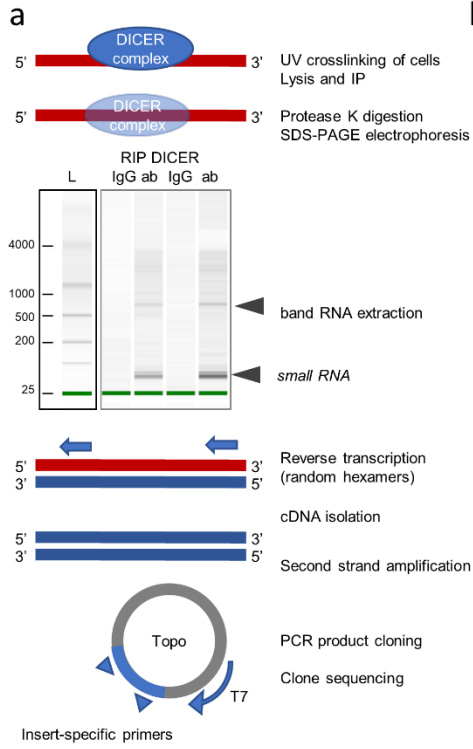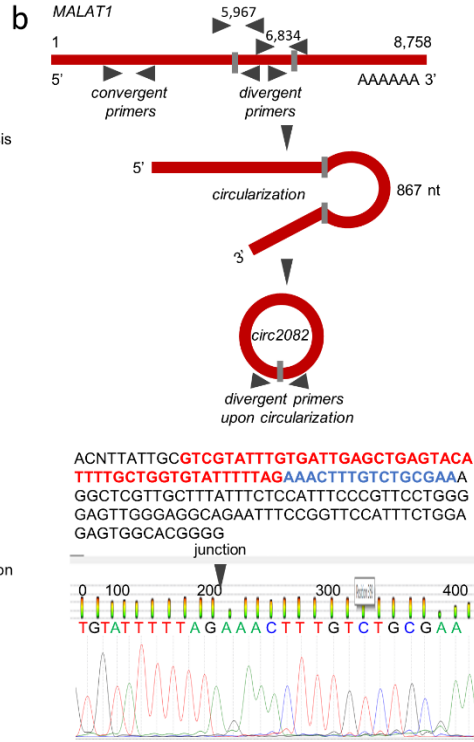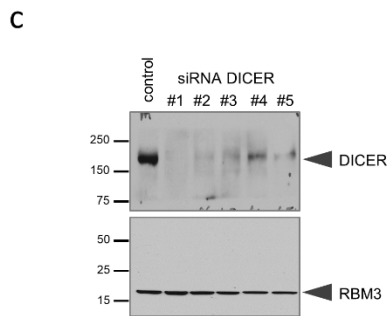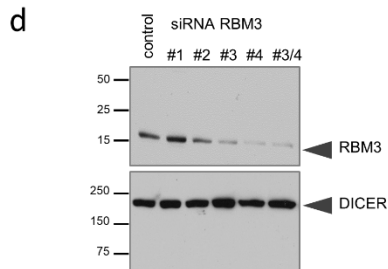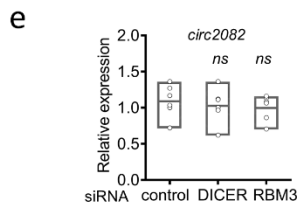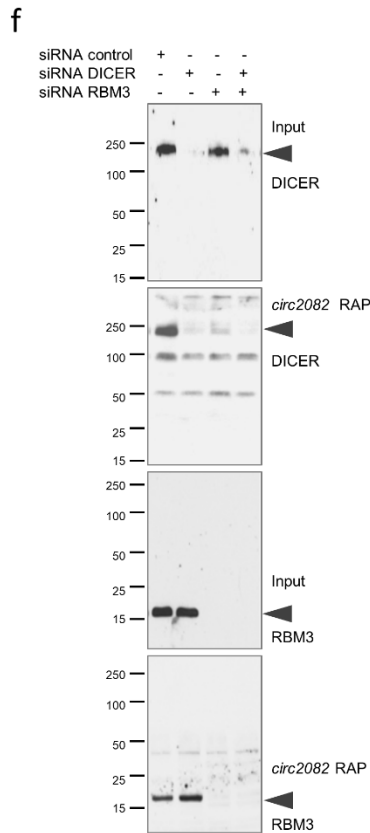

**Supplementary Figure S3 related to Figure 3.**

***Circ2082* that originates from *MALAT1* binds directly to RBM3 and forms complex with DICER.**

**a:** The schematic representation of the experimental flowchart. Protein-RNA immunoprecipitation (RIP) of UV-crosslinked GSC nuclear lysates with DICER antibodies was followed by RNA isolation and analysis by Total RNA Platform Agilent Bioanalyzer. The representative RNA profile is shown (n=2). Arrows indicate *circ2082* and small RNA peaks. The ladder indicates RNA size (nt) on the left.

**b:** The schematic representation of linear *MALAT1* and circularization event leading to the emergence of *circ2082* (top). Primers used throughout the study to distinguish between linear *MALAT1* and *circ2082* are marked by arrows. The junction site sequence and sequencing result are shown (bottom).

**c-d:** Western blot analysis of DICER (**c**) and RBM3 (**d**) in the whole-cell lysate of GSC (n=5) upon their respective siRNA-mediated knockdown using indicated antibodies is shown. Both antibodies were used as a loading control upon the knockdown of their respective protein partners; arrows indicate DICER and RBM3 bands. Corresponding molecular weight is shown on the left.

**e:** Box scatter plot of qPCR analysis of *circ2082* expression with mean  $\pm$ SD, and relative quantification scale is shown (n=5). GSCs were transfected with control, DICER, or RBM3 siRNA.

**f:** Western blot analysis of DICER and RBM3 in GSCs transfected with control, DICER, and/or RBM3 siRNA. UV-crosslinked GSC nuclear lysate inputs and RNA Antisense Purification (RAP) with the anti-*circ2082* probe are shown; arrows indicate DICER and RBM3 bands. Corresponding molecular weight is shown on the left.

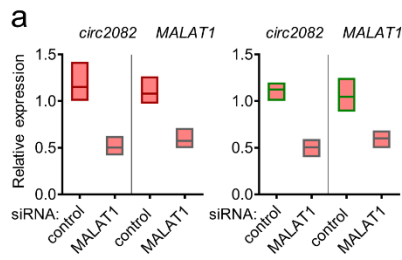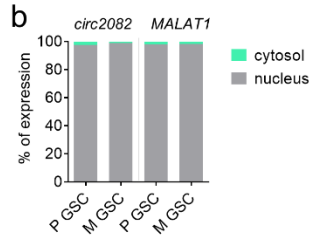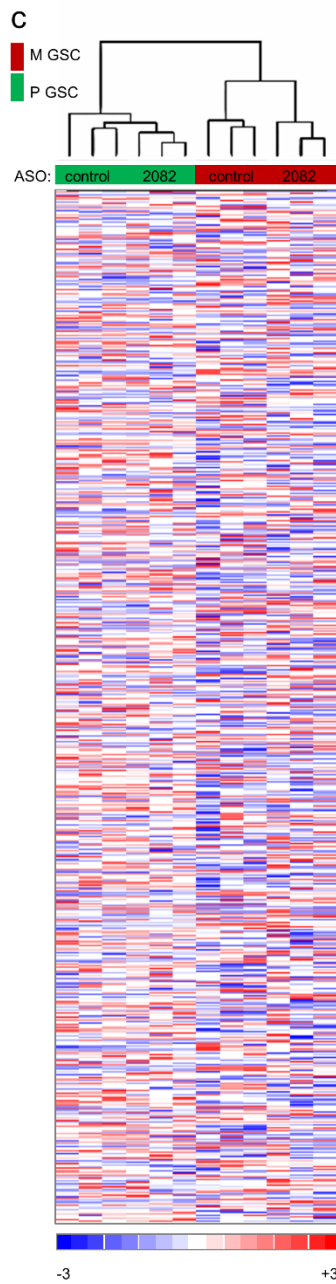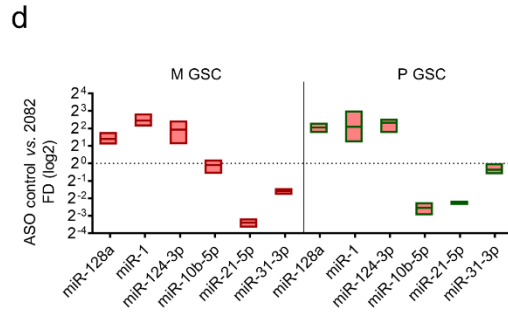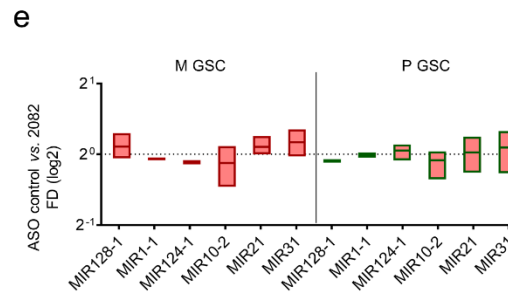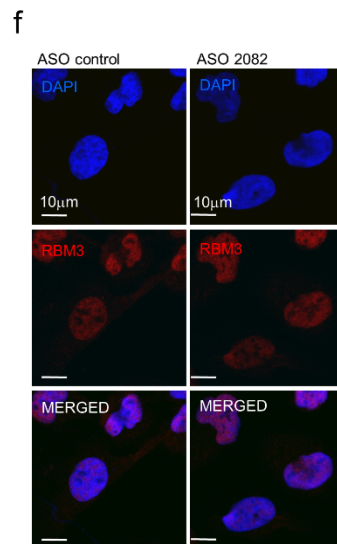



**Supplementary Figure 4 related to Figure 4.**

**ASO treatment that silences *circ2082* but not *MALAT1* affects mature but not precursor microRNAs.**

**a:** Box plot of qPCR analysis for *circ2082* or linear *MALAT1* with mean  $\pm$ SD and relative quantification scale is shown. GSC (of indicated subtypes: red – M GSCs, green – P GSCs, n=3 per subtype) were transfected with control siRNA or *MALAT1* siRNA.

**b:** QPCR analysis of *circ2082* and linear *MALAT1* relative percentage of expression in the nuclear and cytoplasmic fraction of GSCs.

**c:** Heatmap with an unsupervised hierarchical clustering for GSCs transfected with ASO control or *circ2082* (n=3 per subtype) based on mRNA transcripts (p-value < 0.05) is shown. The color bars indicate corresponding clusters.

**d, e:** Box plot of qPCR analysis for indicated mature microRNAs (**d**) and microRNA precursors (**e**) with mean  $\pm$ SD and relative quantification scale is shown. GSC (of indicated subtypes, n=3 per subtype) were transfected with ASO control or *circ2082*.

**f:** Representative images of cultured GSC (n=3 per subtype) transfected with ASO control or *circ2082* are shown. DAPI staining (blue) and RBM3 immunohistochemistry staining (red) analysis was performed. Scale bars: 10 $\mu$ m.

a

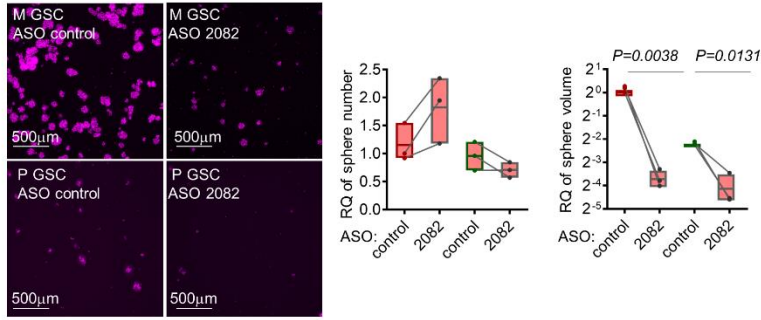

b

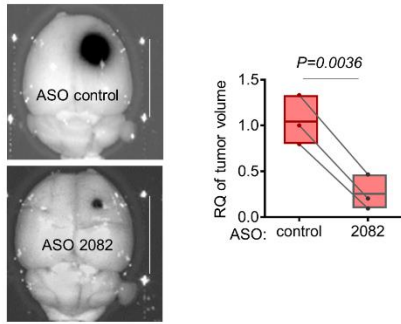

c

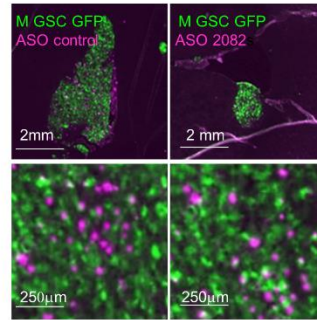

**Supplementary Figure 5 related to Figure 5.**

**ASO-mediated knockdown of *circ2082* mitigates tumorigenicity of GSCs *in vitro* and *in vivo*.**

**a:** Representative micrographs of GSCs (n=3 per subtype) transfected with ASO control or *circ2082* (scale bars: 500 $\mu$ m (**left**)), and box scatter plot of mean  $\pm$ SD of sphere frequency, and volume (**right**) are shown (lines identify matching pairs, the p-value is indicated).

**b:** Representative images of brains with M GSC-originated tumors are shown (**left**). Relative quantification of tumor volume 10 days post-implantation is shown (**right**). Data are shown as mean  $\pm$  SD (matching pairs identified by lines; p-value is indicated).

**c:** Representative images of sections of M GSC-originated tumors are shown. GFP-positive M GSCs were transfected with Cy5-labeled ASO control or *circ2082*, scale bars: 2mm (**top**), 250 $\mu$ m (**bottom**).

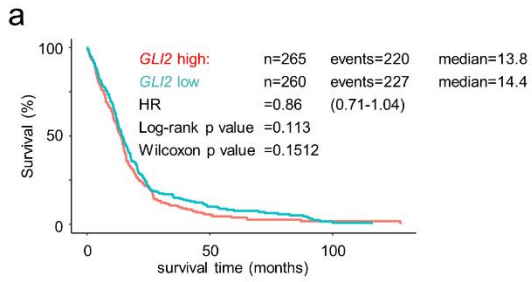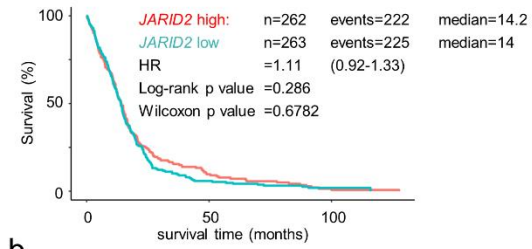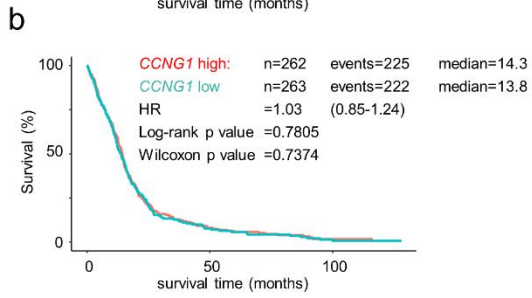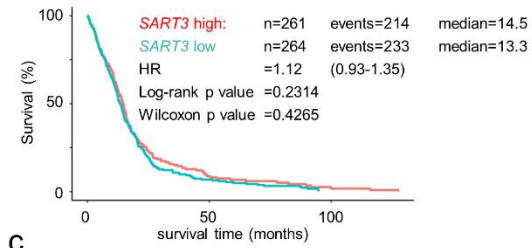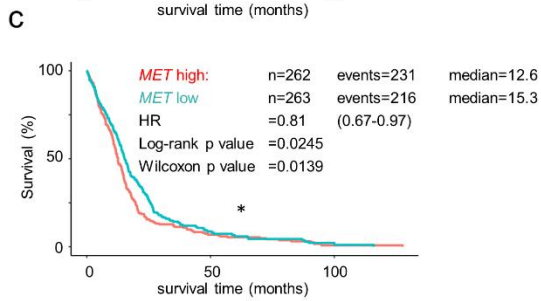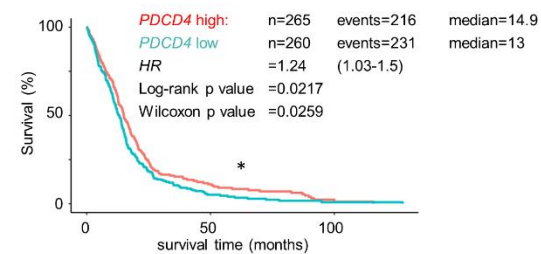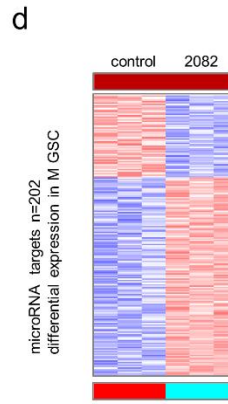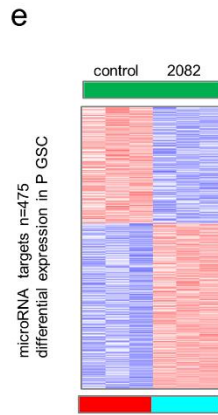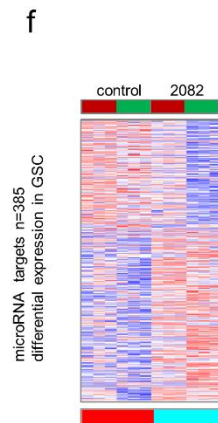

**Supplementary Figure 6 related to Figure 6.****The expression of *circ2082*/microRNAome-controlled genes predict outcome of glioblastoma patients in subtype-independent fashion.**

**a-c:** Kaplan-Meier curves for survival analysis of *GLI2*, *JARID*, *CCNG1*, *SART3*, *MET*, *PDCD4* in TCGA dataset of glioblastoma patients, the p-value is indicated.

**d-f:** Heatmap with a supervised clustering for all GSCs (n=6 (**d**), M GSC, n=3 (**e**) and P GSC, n=3 (**f**) transfected with ASO control or *circ2082* based on the most variable microRNA targets (n=202; n= 475; n=385 out of total 1697, respectively, p-value < 0.05) is shown. GSC's subtype identity is shown as a bar above the heatmap (red – mesenchymal, green – proneural).

**Supplementary Table 1 related to Figure 1b, 1c, 4d-e, 4f.**

MicroRNA expression dataset (based on NanoString)

**Supplementary Table 2 related to Figure 2d, 3e.**

Protein identification dataset (based on mass spectroscopy)

**Supplementary Table 3 related to Figure 6a.**

MicroRNA/mRNA target expression correlation dataset (based on TCGA)

**Supplementary Table 4. Reagents and Resources Used.**

| REAGENT or RESOURCE                                   | SOURCE                      | IDENTIFIER               |
|-------------------------------------------------------|-----------------------------|--------------------------|
| <b>Antibodies</b>                                     |                             |                          |
| DICER (D38E7) Rabbit                                  | Cell Signaling Technology   | mAb #5362                |
| DICER Rabbit                                          | Thermo Fisher               | PA5-23088                |
| TRBP2 (D7C8K) Rabbit                                  | Cell Signaling Technology   | mAb #62043               |
| RBM3 Rabbit                                           | Invitrogen                  | PA5-51976                |
| HISTONE H3 (D1H2) XP® Rabbit                          | Cell Signaling Technology   | mAb #4499                |
| TUBULIN $\alpha$ Mouse (clone DM1A)                   | Sigma-Aldrich               | T9026                    |
| GFP Mouse IgG2A Clone # 454518                        | R&D Systems                 | MAB4240                  |
| Secondary Rabbit anti-Mouse monoclonal                | Novus Biologicals           | MAB0033                  |
| Secondary Goat anti-Rabbit polyclonal                 | Thermo Fisher               | 32460                    |
| <b>Bacterial and Virus Strains</b>                    |                             |                          |
| BL21 Star (DE3) Chemically Competent <i>E. coli</i> * | Thermo Fisher               | C601003                  |
| <b>Biological Samples</b>                             |                             |                          |
| Patient brain tissue                                  | 45                          | N/A                      |
| Patient-derived GSCs                                  | 13                          | N/A                      |
| NPC cells                                             | Millipore Sigma<br>Lonza 46 | SCC007<br>PT-2599<br>N/A |
| <b>Chemicals, Peptides, and Recombinant Proteins</b>  |                             |                          |
| EGF                                                   | Peppo Tech                  | AF-100-15                |
| FGF                                                   | Peppo Tech                  | 100-18C                  |
| B27                                                   | Gibco                       | 21103049                 |
| Neurobasal                                            | Gibco                       | 21103049                 |

|                                                                                                                                                                           |                    |                                                                    |
|---------------------------------------------------------------------------------------------------------------------------------------------------------------------------|--------------------|--------------------------------------------------------------------|
| TRIzol™ Reagent                                                                                                                                                           | TermoFisher        | 15596018                                                           |
| RNase R                                                                                                                                                                   | Epicentre          | RNR07250                                                           |
| Critical Commercial Assays                                                                                                                                                |                    |                                                                    |
| Power Up SYBR Green Master Mix                                                                                                                                            | Thermo Fisher      | A25743                                                             |
| TaqMan Fast Advanced Master Mix                                                                                                                                           | Thermo Fisher      | 4444963                                                            |
| Human v3 miRNA Assay                                                                                                                                                      | Nanostring         | CSO-MIR3-12                                                        |
| Human custom pre-miR Assay                                                                                                                                                | Nanostring         | This paper                                                         |
| Agilent whole human genome microarray                                                                                                                                     | Arraystar          | Agilent-026652 4x44K v2                                            |
| Arraystar Human Circular RNA Array                                                                                                                                        | Arraystar          | AS-S-CR-H-V2.0                                                     |
| TaqMan microRNA Assay                                                                                                                                                     | Applied Biosystems | 4427975                                                            |
| TaqMan Pre-miRNA Assays                                                                                                                                                   | Applied Biosystems | 4426961                                                            |
| iScript™ cDNA Synthesis Kit                                                                                                                                               | Bio-Rad            | 1708890                                                            |
| Nuclear/Cytosol Fractionation Kit                                                                                                                                         | BioVision          | K266                                                               |
| Lipofectamine 2000                                                                                                                                                        | Invitrogen         | 11668030                                                           |
| Deposited Data                                                                                                                                                            |                    |                                                                    |
| NanoString                                                                                                                                                                | This paper         | Supplementary spreadsheets<br>Table 1                              |
| Mass spectrometry                                                                                                                                                         | This paper         | Supplementary spreadsheets<br>Table 2                              |
| Raw and analyzed data                                                                                                                                                     | This paper         | Supplementary spreadsheet<br>Table 3                               |
| Genome microarray                                                                                                                                                         | This paper         | Deposition: GSE146440                                              |
| Circular RNA Array                                                                                                                                                        | This paper         | Deposition: GSE146463                                              |
| Experimental Models: Organisms/Strains                                                                                                                                    |                    |                                                                    |
| Mouse: athymic                                                                                                                                                            | Envigo             | code#069                                                           |
| Oligonucleotides                                                                                                                                                          |                    |                                                                    |
| siRNA targeting sequence: DICER<br>#1 AATGTGCTATCTGGATCCTAG<br>#2 CTGCTCGAAATCTTACGCAA<br>#3 AAGGACGGTGTCTTGGTCAA<br>#4 CTCGCATAGGCATTCCCAGTA<br>#5 ATCGATCCTATGTTCAATCTA | QIAGEN             | SI00300006<br>SI04753987<br>SI02645993<br>SI02645986<br>SI02645972 |
| siRNA targeting sequence: RBM3<br>#1 CAGATCCGTGTGGATCATGCA<br>#2 TGGGACGTTTGTAGAACCTGA<br>#3 ACCGACGAGCAGGCACTGGAA<br>#4 CAAGGAATAATTTCTGATCCA                            | QIAGEN             | SI04297755<br>SI04296166<br>SI04261215<br>SI04146821               |
| siRNA control:                                                                                                                                                            | QIAGEN             | 1027280                                                            |

|                                                                                                                                                                                                                                                                                                                                                                                                                                                                                                                                                                                                                                                                                                                                                                                                                                                                                                                                      |                                                 |                                                                                                      |
|--------------------------------------------------------------------------------------------------------------------------------------------------------------------------------------------------------------------------------------------------------------------------------------------------------------------------------------------------------------------------------------------------------------------------------------------------------------------------------------------------------------------------------------------------------------------------------------------------------------------------------------------------------------------------------------------------------------------------------------------------------------------------------------------------------------------------------------------------------------------------------------------------------------------------------------|-------------------------------------------------|------------------------------------------------------------------------------------------------------|
| <p>QPCR primers:</p> <p><i>MALAT1 (linear, convergent)</i><br/> F: TGATAGCCAAATTGAGACAA<br/> R: TTCAGGGTGAGGAAGTAAAA</p> <p><i>circ2082 (circular, divergent)</i><br/> F: GAAGGAAAAAATCCAGCTGA<br/> R: GAATAAAATTTGTCTTTCCTGCC</p> <p><i>circ2082 (circular, convergent)</i><br/> F: AGGATTTGAGCGGAAGAACGA<br/> R: ACACCAGCAAATGTACTCAGC</p> <p><i>GLI2</i><br/> F: CTGTGGGTTAGGGATGGACTG<br/> R: GTAAAGTGGGTGGACGTTGCA</p> <p><i>JARID</i><br/> F: GACACCAAACCCAATCACCAC<br/> R: GTTCAACCTGCCACTGACCTT</p> <p><i>CCNG1</i><br/> F: CCTTCTGTGTTGGCATTGTCTATC<br/> R: CAAGCTCTTGCCAGAAGGTCAG</p> <p><i>SART3</i><br/> F: GGAGATTTGGCAGGCATACCTTG<br/> R: CTCTCCACCTCCTGCTTCAGA</p> <p><i>MET</i><br/> F: TAGCCAACCGAGAGACAAGC<br/> R: TGTGCTCCCACCACTAATAAAAAG</p> <p><i>PDCD4</i><br/> F: TGTA AACCTGCAGATCCTGA<br/> R: TGGAGGATGCTGAAATCCAAT</p> <p><i>18S rRNA</i><br/> F: AACTTTCGATGGTAGTCGCCG<br/> R: CCTTGGATGTGGTAGCCGTTT</p> | <p>Invitrogen</p>                               | <p>N/A</p>                                                                                           |
| <p>RBM3 cloning primers:<br/> F: AAAGAATTCATGTCCTCTGAAGAAGGA,<br/> R: AAACCTCGAGTCAGTTGTCATAATTGTC</p>                                                                                                                                                                                                                                                                                                                                                                                                                                                                                                                                                                                                                                                                                                                                                                                                                               | <p>Invitrogen</p>                               | <p>This paper</p>                                                                                    |
| <p>Antisense oligo (ASO):<br/> Control: GCGTATTATAGCCGATTAAC<br/> <i>circ2082</i>: GTTTCTAAAAATACACCAGC</p> <p>Knockdown and in situ visualization:<br/> Phosphorothioate bond-Cy5</p> <p>RAP assay:<br/> 5' biotinylated</p> <p>FISH assay:<br/> CCATTAAAGAGTGTTTCGCAGACAAA<br/> GTTTCTAAAAATACACCAGCAAATGTAC</p>                                                                                                                                                                                                                                                                                                                                                                                                                                                                                                                                                                                                                   | <p>IDT</p> <p>Invitrogen<br/> Thermo Fisher</p> | <p>This paper</p>                                                                                    |
| <p>TaqMan microRNA probes:<br/> <i>miR-128</i><br/> <i>miR-124-3p</i><br/> <i>miR-1</i><br/> <i>miR-10b-5p</i><br/> <i>miR-21-5p</i><br/> <i>miR-31-5p</i><br/> U6</p>                                                                                                                                                                                                                                                                                                                                                                                                                                                                                                                                                                                                                                                                                                                                                               | <p>Life Technologies</p>                        | <p>Assay ID:<br/> 002216<br/> 003188<br/> 002222<br/> 002218<br/> 000397<br/> 002279<br/> 001973</p> |

|                                                                                                                                          |                    |                                                                                                                                                                                       |
|------------------------------------------------------------------------------------------------------------------------------------------|--------------------|---------------------------------------------------------------------------------------------------------------------------------------------------------------------------------------|
| TaqMan pre-microRNA probes:<br>MIR128-1<br>MIR128-2<br>MIR124-1<br>MIR124-2<br>MIR124-3<br>MIR1-1<br>MIR1-2<br>MIR10-2<br>MIR21<br>MIR31 | QIAGEN             | Assay ID:<br>MP00000574<br>MP00000588<br>MP00000371<br>MP00000378<br>MP00000392<br>MP00003990<br>MP00004053<br>MP00000168<br>MP00001498<br>MP00007889                                 |
| Recombinant DNA                                                                                                                          |                    |                                                                                                                                                                                       |
| pCDH-EF1-copGFP vector                                                                                                                   | System Biosciences | CD511B-1                                                                                                                                                                              |
| pCDH-EF1-copGFP-RBM3                                                                                                                     | This paper         | N/A                                                                                                                                                                                   |
| Software and Algorithms                                                                                                                  |                    |                                                                                                                                                                                       |
| ImageJ                                                                                                                                   | 47                 | <a href="https://imagej.nih.gov">https://imagej.nih.gov</a>                                                                                                                           |
| GlioVis                                                                                                                                  | 48                 | <a href="http://gliovis.bioinfo.cnio.es/?ref=labworm">http://gliovis.bioinfo.cnio.es/?ref=labworm</a>                                                                                 |
| GBM-BioDP                                                                                                                                | 49                 | <a href="https://gbm-biodp.nci.nih.gov">https://gbm-biodp.nci.nih.gov</a>                                                                                                             |
| Betastasis                                                                                                                               | 50                 | <a href="https://betastasis.com">https://betastasis.com</a>                                                                                                                           |
| Subcell Barcode                                                                                                                          | 51                 | <a href="http://www.subcellbarcode.org">http://www.subcellbarcode.org</a>                                                                                                             |
| Other                                                                                                                                    |                    |                                                                                                                                                                                       |
| TCGA glioblastoma platforms data set:<br>Affymetrix HT HG U133A<br>Agilent Human miRNA 8x15K<br>Affymetrix Human Exon 1.0 ST             | 52                 | <a href="https://www.cancer.gov/about-nci/organization/ccg/research/structural-genomics/tcga">https://www.cancer.gov/about-nci/organization/ccg/research/structural-genomics/tcga</a> |
